# Supplementary material for: Activation of α7 Nicotinic Acetylcholine Receptor Ameliorates Zymosan-Induced Acute Kidney Injury in BALB/c Mice
Source: PubMed Central journal article supplement (PMC6235888; doi:10.1038/s41598-018-35254-1), 2018-11-14
Supplement: 41598_2018_35254_MOESM1_ESM.pdf [file 41598_2018_35254_MOESM1_ESM.pdf]

Activation of  $\alpha 7$  Nicotinic Acetylcholine Receptor Ameliorates Zymosan-Induced Acute Kidney Injury in BALB/c mice

Sherehan M. Ibrahim <sup>a\*</sup>, Muhammad Y. Al-Shorbagy <sup>a,b</sup>, Dalaal M. Abdallah <sup>a</sup>, Hanan S. El-Abhar <sup>a</sup>

<sup>a</sup> Department of Pharmacology & Toxicology, Faculty of Pharmacy, Cairo University, Egypt

<sup>b</sup> School of Pharmacy, NewGiza University, Egypt

\* Correspondence:

Sherehan M. Ibrahim, [Sherehan.mohamed@pharma.cu.edu.eg](mailto:Sherehan.mohamed@pharma.cu.edu.eg), Tel: +201003827007

**pY1007/1008 - JAK2**

**pY705-STAT3**

**SOCS3**

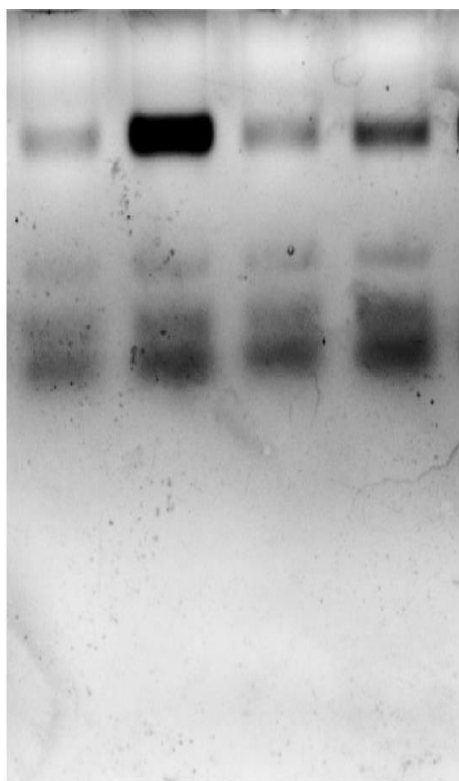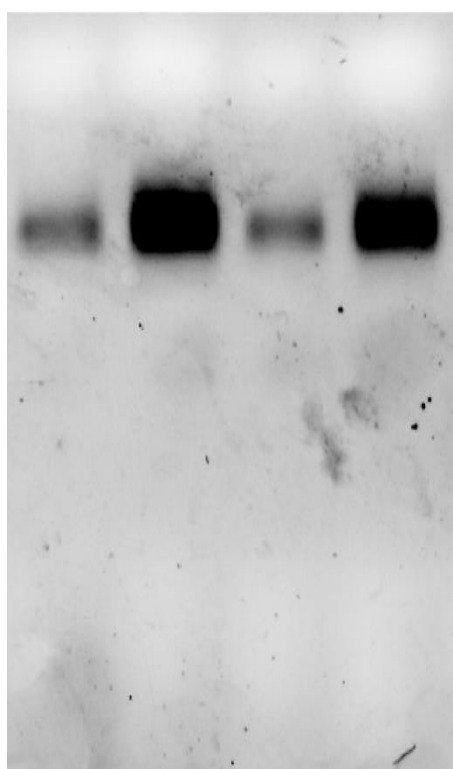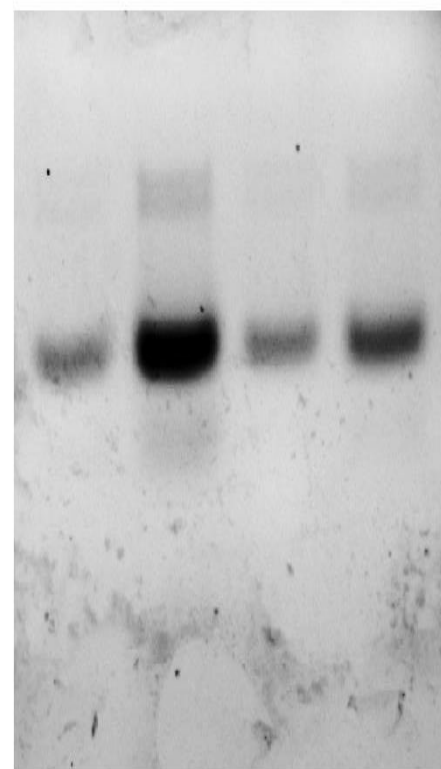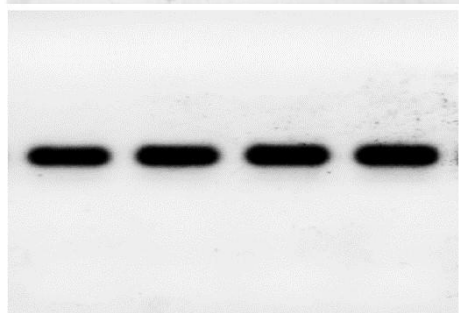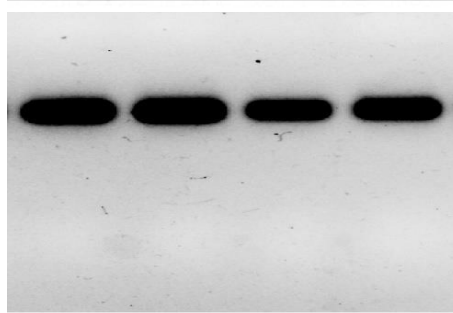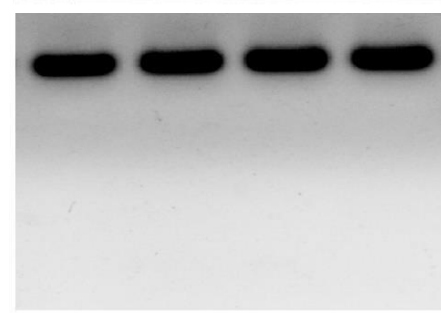

***β-Actin***

***β-Actin***

***β-Actin***
